# Supplementary material for: Band gap engineering design for construction of energy-levels well-matched semiconductor heterojunction with enhanced visible-light-driven photocatalytic activity
Source: Royal Society of Chemistry journal article supplement (doi:10.1039/c4ra05708b), 2014-01-01
Supplement: c4ra05708b1.pdf [file c4ra05708b1.pdf]

## Supporting information for

# **Band gap engineering design for construction of energy-levels well-matched semiconductor heterojunction with enhanced visible-light-driven photocatalytic activity**

**Hongwei Huang\*†, Shuobo Wang†, Yihe Zhang\*†, Paul K. Chu‡**

*† National Laboratory of Mineral Materials, School of Materials Science and Technology, China*

*University of Geosciences, Beijing, 100083, PR China*

*‡ Department of Physics and Materials Science, City University of Hong Kong, Tat Chee Avenue,*

*Kowloon, Hong Kong, China*

\*Corresponding author: hhw@cugb.edu.cn (H.W. Huang); zyh@cugb.edu.cn. (Y.H. Zhang)

Table S1. Band gap, CB and VB of  $Mg_{1-x}Cu_xWO_4$  ( $x=0, 0.1, 0.2, 0.3, 0.4$  and  $1$ )

|                     | MgWO <sub>4</sub> | Mg <sub>0.9</sub> Cu <sub>0.1</sub> WO <sub>4</sub> | Mg <sub>0.8</sub> Cu <sub>0.2</sub> WO <sub>4</sub> | Mg <sub>0.7</sub> Cu <sub>0.3</sub> WO <sub>4</sub> | Mg <sub>0.6</sub> Cu <sub>0.4</sub> WO <sub>4</sub> | CuWO <sub>4</sub> |
|---------------------|-------------------|-----------------------------------------------------|-----------------------------------------------------|-----------------------------------------------------|-----------------------------------------------------|-------------------|
| X(eV)               | 6.135             | 6.141                                               | 6.171                                               | 6.189                                               | 6.191                                               | 6.315             |
| E <sub>g</sub> (eV) | 3.89              | 2.87                                                | 2.85                                                | 2.79                                                | 2.74                                                | 1.84              |
| CB(eV)              | -0.31             | 0.21                                                | 0.25                                                | 0.30                                                | 0.32                                                | 0.6               |
| VB(eV)              | 3.58              | 3.08                                                | 3.10                                                | 3.09                                                | 3.06                                                | 2.44              |

$$E_{VB}=X-E^e+0.5E_g; \quad E_{CB}=E_{VB}-E_g$$

where  $X$  is the absolute electronegativity of the semiconductors, which is defined as the geometric average of the absolute electronegativity of the constituent atoms,  $E^e$  is the energy of free electrons on the hydrogen scale ( $\approx 4.5$  eV), and  $E_g$  is the band gap.

Table S2. ICP Elemental Analysis of  $\text{Mg}_{0.7}\text{Cu}_{0.3}\text{WO}_4/\text{Bi}_2\text{WO}_6$  with different molar ratios (calculated in stoichiometric proportion )

| $\text{Mg}_{0.7}\text{Cu}_{0.3}\text{WO}_4/\text{Bi}_2\text{WO}_6$ | 1:2  | 1:4  | 1:6  | 1:10  |
|--------------------------------------------------------------------|------|------|------|-------|
| Mg                                                                 | 2.40 | 2.35 | 2.34 | 2.63  |
| Cu                                                                 | 1    | 1    | 1    | 1     |
| Bi                                                                 | 13.6 | 27.2 | 42.2 | 77.11 |
| W                                                                  | 9.5  | 16.1 | 23.8 | 42.63 |

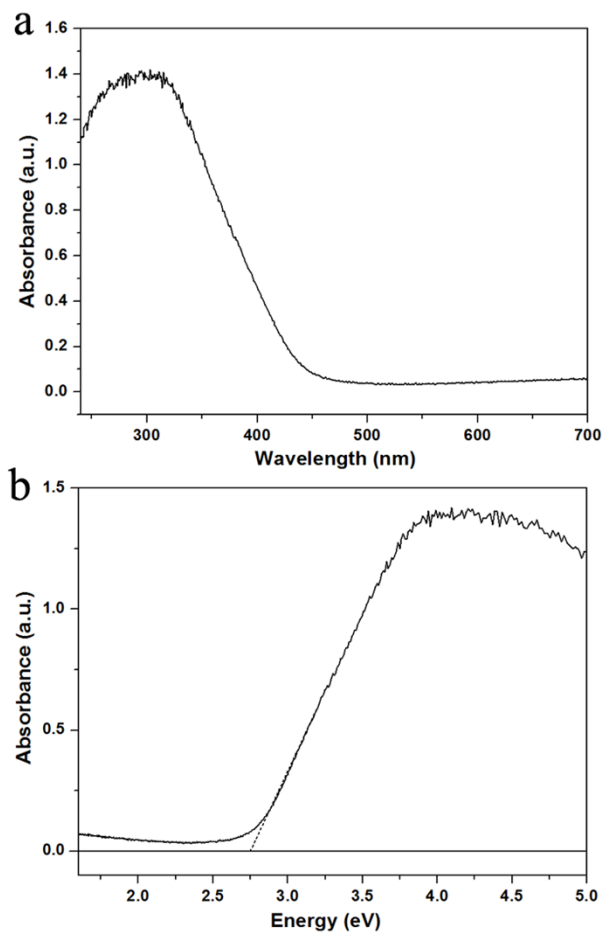

Fig. S1 (a) Diffuse reflectance spectra and (b) Band gap of  $\text{Bi}_2\text{WO}_6$ .

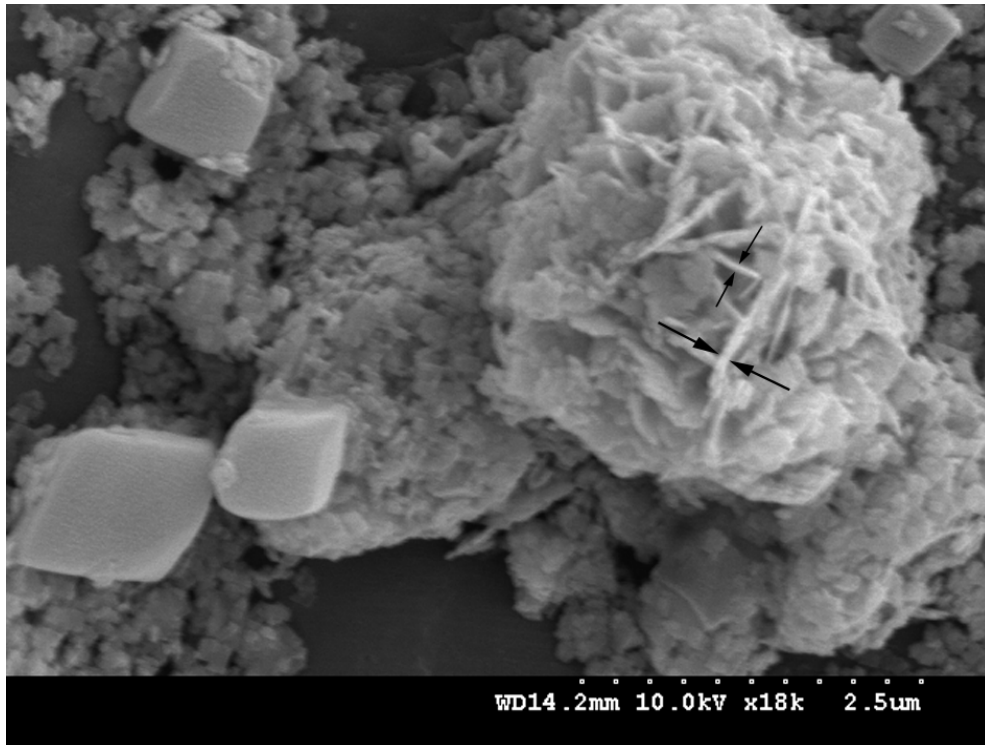

Fig. S2 SEM image of 1:4 Mg<sub>0.7</sub>Cu<sub>0.3</sub>WO<sub>4</sub>/Bi<sub>2</sub>WO<sub>6</sub> heterojunction.

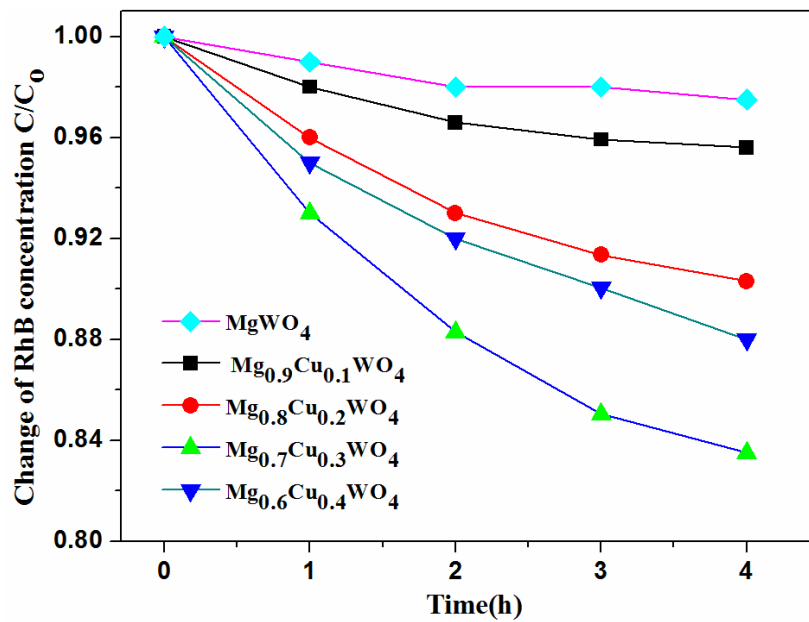

Fig. S3 Photocatalytic degradation curves of RhB under visible-light irradiation over  $\text{Mg}_{1-x}\text{Cu}_x\text{WO}_4$  ( $x=0, 0.1, 0.2, 0.3$  and  $0.4$ ).
